# Supplementary material
Source: bioRxiv or medRxiv preprint supplement (https://medrxiv.org/content/medrxiv/early/2021/09/27/2021.09.24.21264038/DC1/embed/media-1.pdf)
Supplement: Supplementary file [file media-1.pdf]

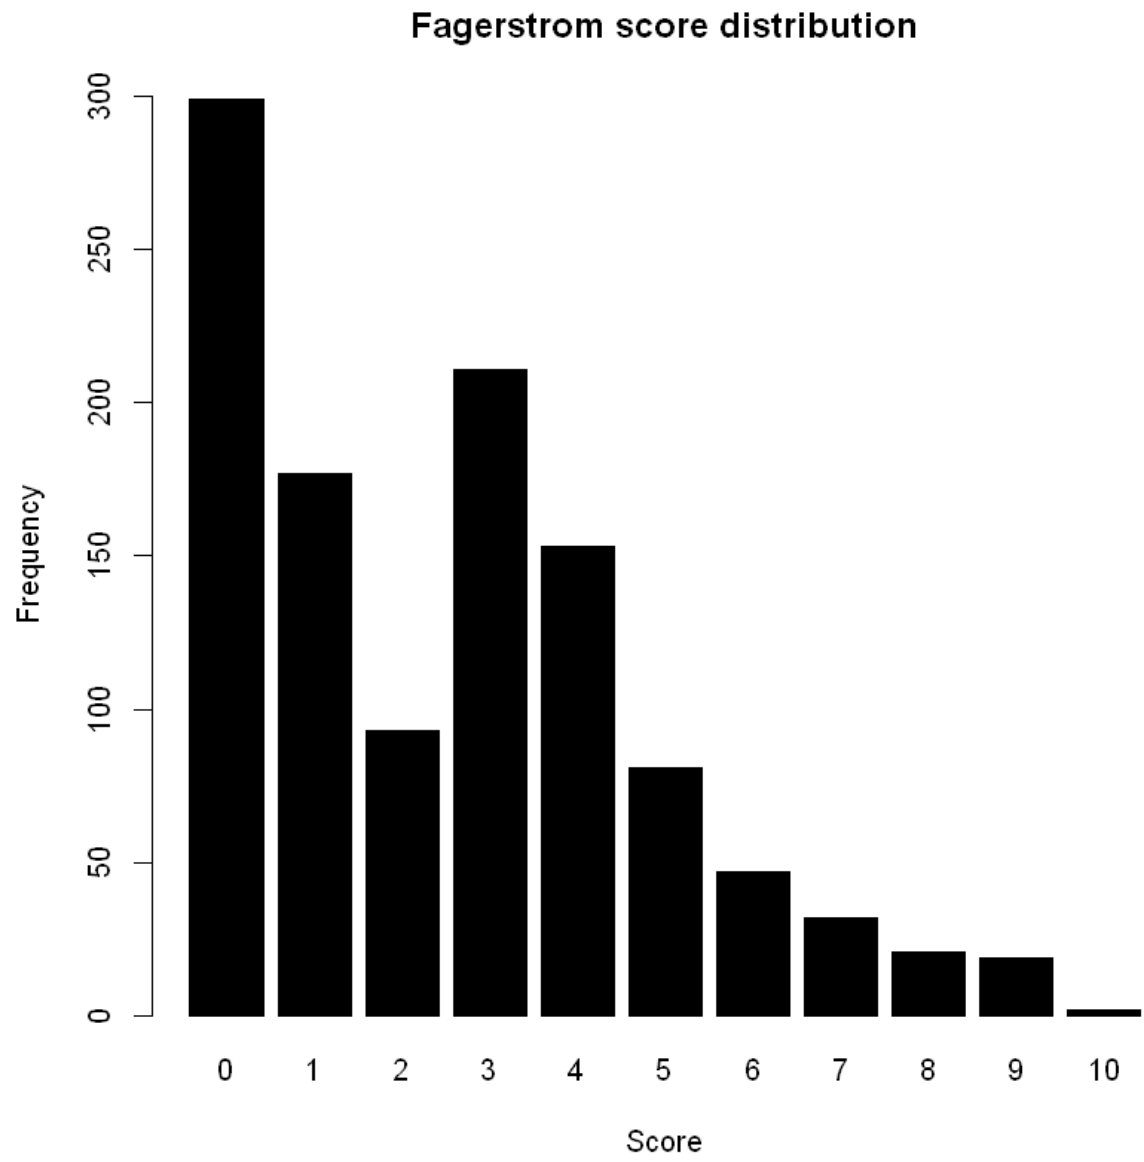

**Supplementary Figure S1. Distribution of Fagerström test score.** The graph shows the distribution of the Fagerström score to our sample with Mean = 2.54 and standard deviation = 2.29.

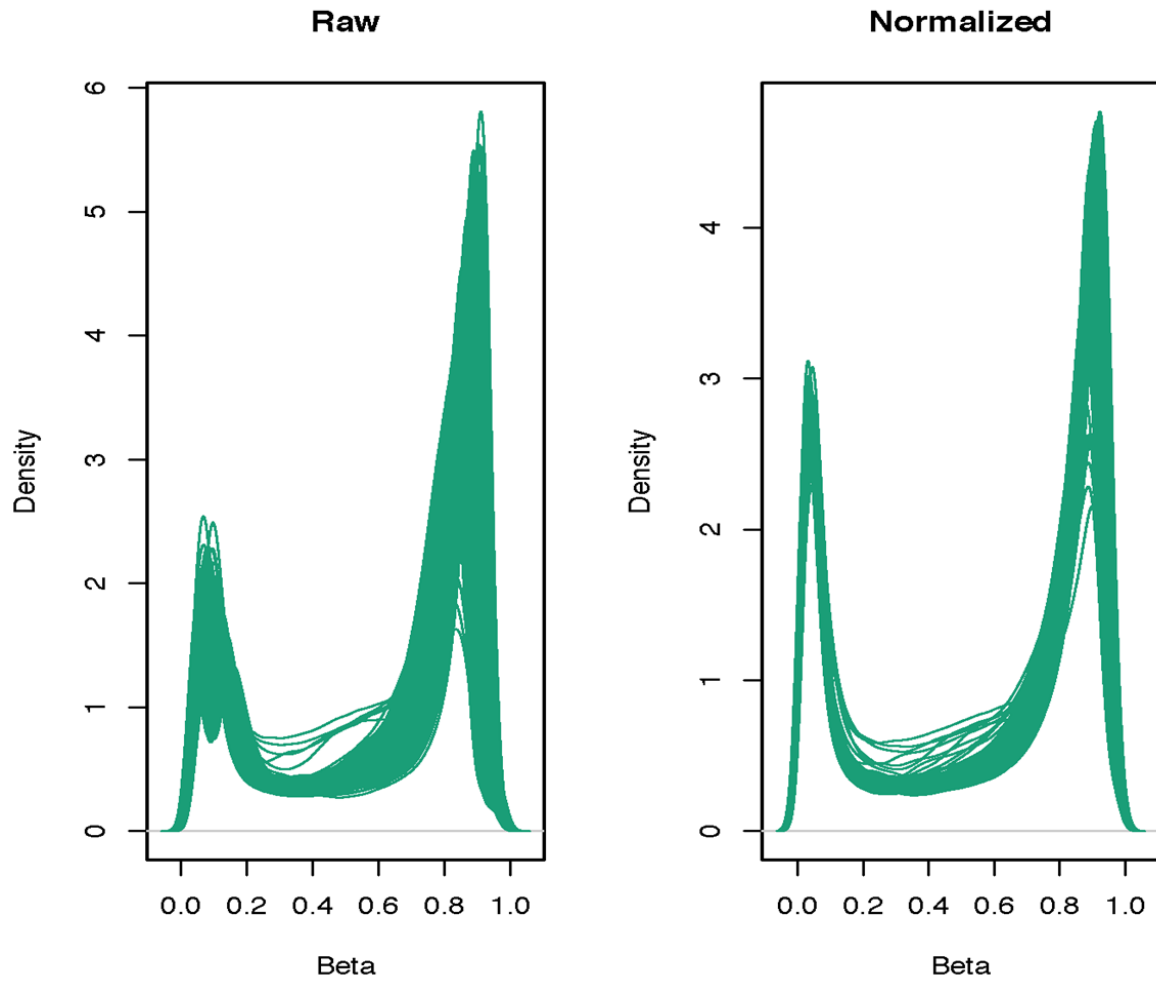

**Supplementary Figure S2. Density plots before and after normalization.** The density plot at the left side represents the raw data, while the density plot at the right site represents the normalized data.

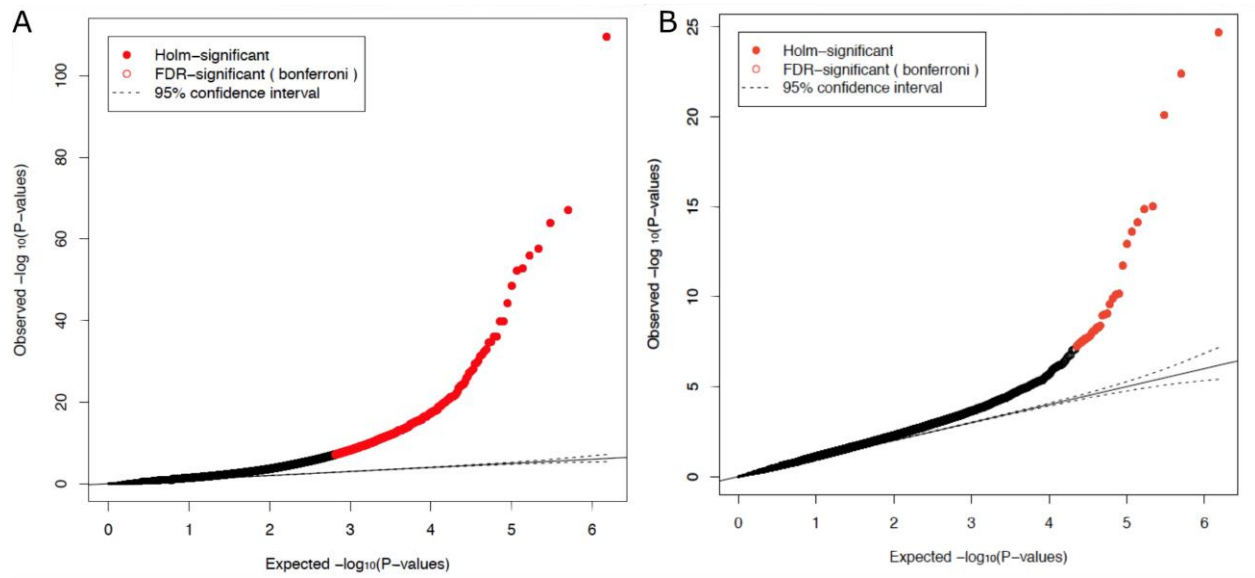

**Supplementary Figure S3. QQ plot to EWAS analysis.** A) SS EWAS analysis,  $\lambda = 1.41$ ; B) ND EWAS analysis,  $\lambda = 1.11$ .

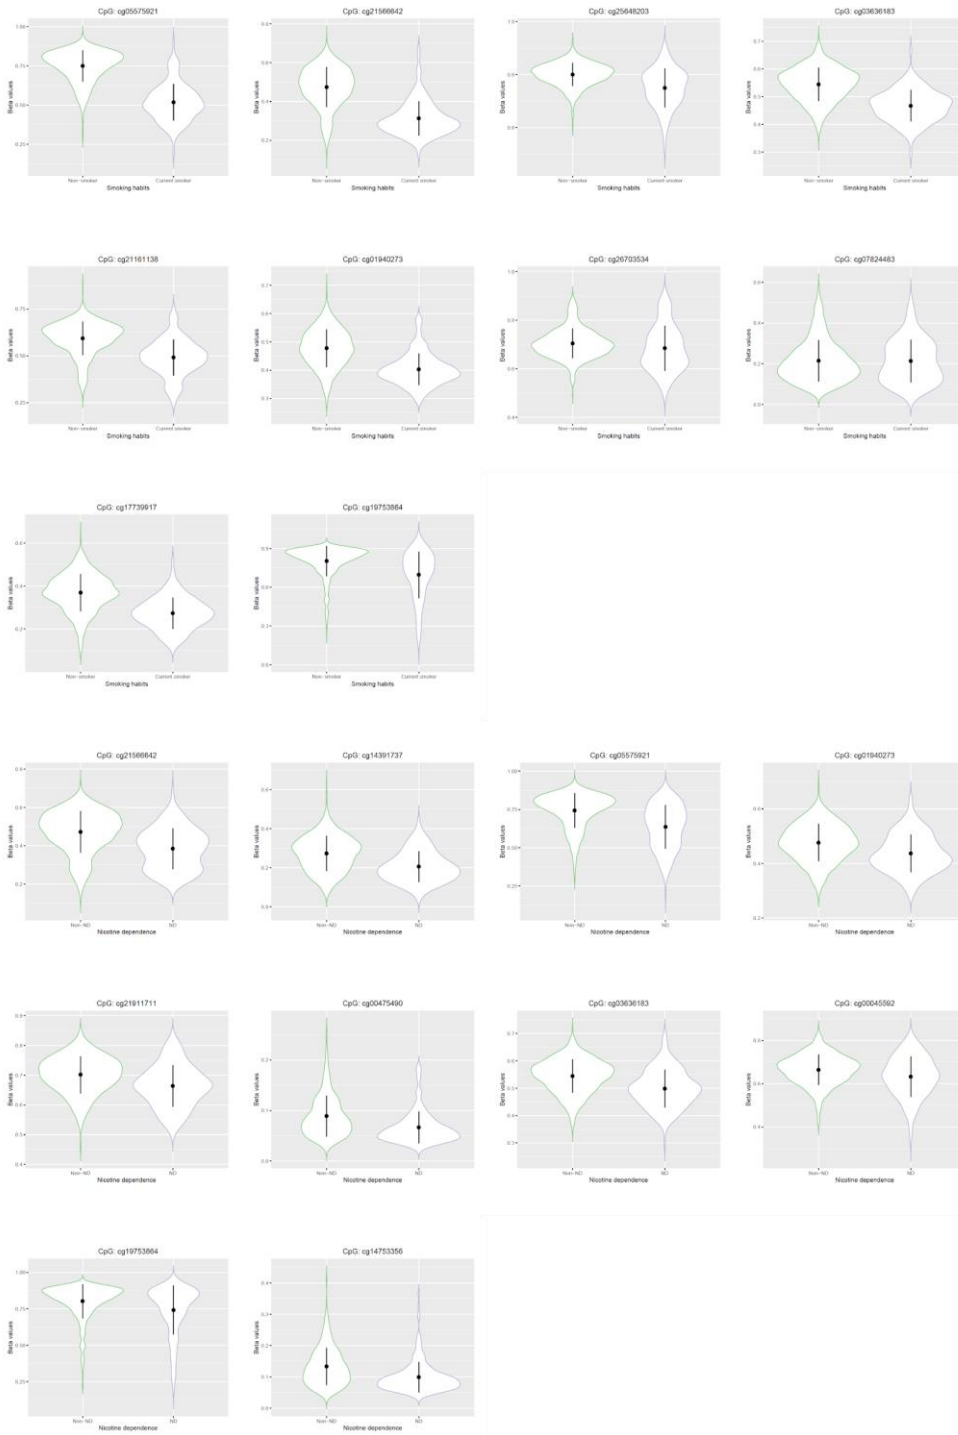

**Supplementary Figure S4. Violin plot to the top 10 ND- and SS-related DMS.** The first ten violin plot represents the beta distribution to the top 10 SS-related sites, while the last ten represents the beta distribution to the top 10 ND-related sites.

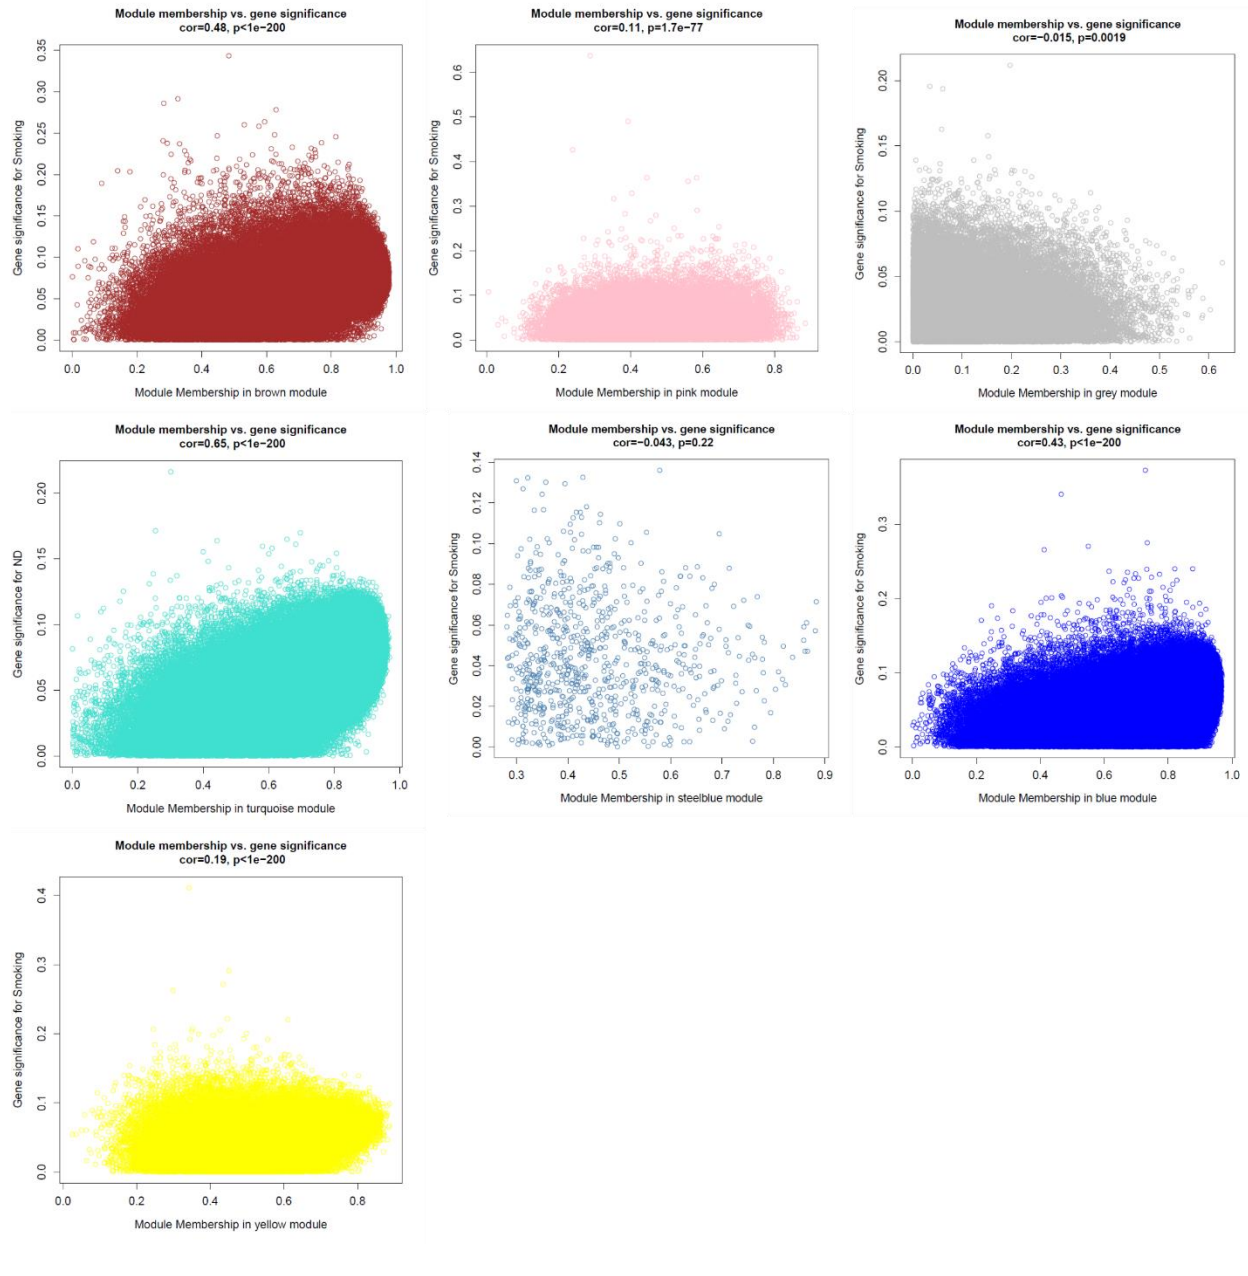

**Supplementary Figure S5. Module membership and gene significance.** The module membership analysis was conducted to all modules with biological function.

**Supplementary Table 1. DMS associated with SS.** 450 DMS were detected in SS EWAS. B = (1), SB = (2), T = (3), Wk = (4), S = (5), W = (6), Sk = (7), M = (8), R = (9), D = (10). \* DMS also detected in ND analysis. Effect =  $(\text{Mean}\beta_{\text{SS}} - \text{Mean}\beta_{\text{non-SS}})/\text{Sd}$ .

| CpG Name    | Chromosome | Position  | Gene<br>Annotation | P-value  | Effect  | Literature      |
|-------------|------------|-----------|--------------------|----------|---------|-----------------|
|             |            |           |                    |          |         | References      |
| cg05575921* | chr5       | 373378    | AHRR               | 4.54E-83 | -2.0189 | B, SB, T, Wk, D |
| cg21566642* | chr2       | 233284661 | ALPPL2             | 3.87E-50 | -1.7522 | S, SB, T, D     |
| cg25648203  | chr5       | 395444    | AHRR               | 8.91E-48 | -0.3967 | S, SB, T, D     |
| cg03636183* | chr19      | 17000585  | F2LR3              | 8.91E-48 | -1.1037 | S, SB, D        |
| cg21161138  | chr5       | 399360    | AHRR               | 9.05E-42 | -1.5547 | S, SB, Wk, D    |
| cg01940273* | chr2       | 233284934 | ALPPL2             | 2.14E-39 | -1.8733 | S, SB, T, D     |
| cg26703534  | chr5       | 377358    | AHRR               | 6.93E-39 | -0.3132 | S, D            |
| cg07824483  | chr17      | 79882042  | MAFG               | 3.79E-36 | -0.0212 | Sk              |
| cg17739917  | chr17      | 38477572  | RARA               | 6.21E-33 | -0.7308 | D               |
| cg19753864* | chr2       | 38320028  | CYP1B1             | 9.44E-30 | -1.7932 |                 |
| cg05086879  | chr22      | 39861490  | MGAT3              | 1.17E-29 | -0.2499 | D               |
| cg00132045  | chr17      | 70565953  | AC007639.1         | 5.10E-27 | -0.4343 |                 |
| cg16859537  | chr11      | 12028319  | DKK3               | 5.24E-27 | -1.2381 |                 |
| cg06427233  | chr7       | 134133904 | AKR1B1             | 5.97E-26 | -0.7341 |                 |
| cg02162897  | chr2       | 38300537  | AKR1B1             | 7.85E-26 | -1.4789 | W, T            |
| cg09935388  | chr1       | 92947588  | GFI1               | 1.35E-24 | -2.4943 | S, Wk, D        |
| cg23398508  | chr17      | 70536199  | AC007639.1         | 2.64E-24 | 0.3237  |                 |
| cg15159987  | chr19      | 17003890  | CPAMD8             | 9.64E-24 | -0.2722 | Sk, D           |
| cg17087741  | chr2       | 233283010 |                    | 1.69E-23 | -0.4254 | D               |
| cg03329539  | chr2       | 233283329 | ALPPL2             | 1.15E-22 | -0.6160 | S, SB, D        |
| cg05284742  | chr14      | 93552128  | ITPK1              | 3.07E-22 | -0.8777 | SB, D           |
| cg04066994  | chr5       | 394891    | AHRR               | 4.37E-22 | -0.6592 |                 |
| cg24090911  | chr5       | 400732    | AHRR               | 4.25E-21 | -0.3952 | S               |
| cg18110140* | chr15      | 75350380  | PPCDC              | 7.13E-21 | -0.3119 | D               |
| cg04744744  | chr17      | 70515363  | AC007639.1         | 1.39E-20 | -0.0956 |                 |
| cg12516954  | chr5       | 134714262 |                    | 1.98E-20 | 0.8521  |                 |
| cg16841366  | chr2       | 233286192 | AC068134.6         | 8.52E-20 | -1.0154 | D               |
| cg10987682  | chr2       | 23509827  |                    | 1.48E-19 | -0.3419 |                 |
| cg14753356  | chr6       | 30720108  | IER3               | 6.81E-19 | -0.8003 | S, SB, D        |
| cg08836861  | chr16      | 69757867  | NQO1               | 2.17E-18 | -1.1825 |                 |
| cg04997452  | chr15      | 39697356  |                    | 2.29E-18 | 0.0344  |                 |
| cg01533470  | chr17      | 70599452  |                    | 3.36E-18 | -0.3412 |                 |
| cg27414352  | chr17      | 70521905  | AC007639.1         | 3.38E-18 | -0.0791 |                 |
| cg14389122  | chr15      | 74945851  |                    | 7.20E-18 | -0.9147 |                 |
| cg06036945  | chr5       | 394869    | AHRR               | 9.81E-18 | -0.5995 |                 |
| cg21911711* | chr19      | 16998668  | F2RL3              | 4.48E-17 | -0.5038 |                 |
| cg02206695  | chr17      | 40474743  | STAT3              | 9.02E-17 | -0.1966 |                 |
| cg06926619  | chr17      | 48738552  |                    | 1.51E-16 | -0.1936 |                 |
| cg24688690  | chr5       | 345850    | AHRR               | 2.05E-16 | 0.0326  | Sk, S           |

|             |       |           |                   |          |         |                 |
|-------------|-------|-----------|-------------------|----------|---------|-----------------|
| cg26843110  | chr15 | 74935742  |                   | 2.76E-16 | -1.2189 |                 |
| cg24805089  | chr5  | 176860947 |                   | 3.29E-16 | -0.7824 |                 |
| cg21611682  | chr11 | 68138269  | LRP5              | 3.40E-16 | -0.2598 | S, SB, T, D     |
| cg13378563  | chr2  | 95978247  | KCNIP3            | 3.44E-16 | -0.5359 |                 |
| cg00045592* | chr1  | 160714299 |                   | 4.27E-16 | -0.4701 | D               |
| cg07741821  | chr7  | 26577897  |                   | 6.61E-16 | -0.2143 | D               |
| cg26177418  | chr2  | 59464167  | AC007131.1        | 9.05E-16 | -0.2896 |                 |
| cg20390237  | chr1  | 48965049  |                   | 1.00E-15 | -0.3660 |                 |
| cg16252872  | chr1  | 145039193 |                   | 1.44E-15 | 0.5853  |                 |
| cg02025117  | chr2  | 38335521  | CYP1B1            | 1.75E-15 | -0.4721 |                 |
| cg27492584  | chr17 | 70599307  |                   | 2.51E-15 | -0.5423 |                 |
| cg21396804  | chr17 | 70575720  | AC007639.1        | 3.46E-15 | -0.9401 |                 |
| cg11660018  | chr11 | 86510915  | PRSS23            | 3.85E-15 | 0.1345  | SB, D           |
| cg10180919  | chr2  | 234608559 | AC114812.8        | 4.02E-15 | -0.2592 |                 |
| cg07302361  | chr17 | 70598973  |                   | 4.94E-15 | -1.3165 |                 |
| cg23258611  | chr17 | 70536160  | AC007639.1        | 5.43E-15 | 0.2944  |                 |
| cg10721256  | chr16 | 67560556  | CTD-<br>2012K14.1 | 7.61E-15 | -0.1156 |                 |
| cg04554564  | chr17 | 19990302  | SPECC1            | 1.36E-14 | -0.8254 |                 |
| cg15342087  | chr6  | 30720209  | IER3              | 1.40E-14 | -0.9984 | S, SB, D        |
| cg20288271  | chr22 | 46117200  |                   | 1.50E-14 | -0.8507 |                 |
| cg22222502  | chr5  | 150161551 | C5orf62           | 1.64E-14 | -0.4513 | D               |
| cg08445278  | chr22 | 30671877  |                   | 1.96E-14 | 0.8438  |                 |
| cg02485605  | chr10 | 80948302  | ZMIZ1             | 2.52E-14 | -0.8263 |                 |
| cg04646928  | chr2  | 234602174 | UGT1A6            | 6.67E-14 | -1.1209 |                 |
| cg16958050  | chr5  | 73335902  |                   | 6.82E-14 | 0.0273  |                 |
| cg03450842  | chr10 | 80834947  | ZMIZ1             | 8.03E-14 | -0.5618 | S, SB, D        |
| cg27241845  | chr2  | 233250370 |                   | 9.02E-14 | -0.5879 | SB              |
| cg13006859  | chr3  | 185679602 | RP11-<br>443P15.2 | 9.14E-14 | -0.1050 |                 |
| cg14712058  | chr19 | 16988083  |                   | 1.04E-13 | -0.1166 | Sk, D           |
| cg19572487* | chr17 | 38476024  | RARA              | 1.15E-13 | -0.6122 | S, SB, D        |
| cg06484100  | chr17 | 41799087  |                   | 1.22E-13 | 0.0149  |                 |
| cg09746554  | chr22 | 29313113  | ZNRF3             | 1.27E-13 | -1.1193 |                 |
| cg08493167  | chr14 | 106329560 | IGHJ6             | 1.48E-13 | -0.3999 |                 |
| cg27064337  | chr8  | 18925266  |                   | 1.64E-13 | 0.4918  |                 |
| cg14466441  | chr6  | 11392193  |                   | 1.72E-13 | -0.1008 | D               |
| cg06252276  | chr11 | 34852392  |                   | 2.10E-13 | -0.3391 |                 |
| cg14580211  | chr5  | 150161299 | C5orf62           | 2.18E-13 | -0.3870 | S, SB, D        |
| cg22593807  | chr10 | 80015107  |                   | 3.15E-13 | -0.2871 |                 |
| cg07390844  | chr18 | 72935911  | TSHZ1             | 3.23E-13 | -0.8977 |                 |
| cg20385913  | chr15 | 75054510  |                   | 3.54E-13 | -0.3773 |                 |
| cg12956751  | chr2  | 233246922 | AC068134.8        | 3.56E-13 | -0.4515 |                 |
| cg23079012  | chr2  | 8343710   | AC007464.1        | 4.10E-13 | -0.4282 | SB, D           |
| cg25189904  | chr1  | 68299493  | GNG12             | 5.06E-13 | -1.8007 | S, SB, T, Wk, D |
| cg15660755  | chr1  | 11199669  | MTOR              | 6.22E-13 | -0.2189 |                 |

|             |       |           |               |          |         |       |
|-------------|-------|-----------|---------------|----------|---------|-------|
| cg03993839  | chr16 | 55851398  |               | 7.30E-13 | -0.5034 |       |
| cg04535902  | chr1  | 92947332  |               | 8.28E-13 | -0.9800 | Sk    |
| cg12806681  | chr5  | 368394    | AHRR          | 1.01E-12 | -0.1594 | S, SB |
| cg20545852  | chr12 | 28211458  |               | 1.03E-12 | -0.5442 |       |
| cg27638168  | chr17 | 19644741  |               | 1.07E-12 | -0.5416 |       |
| cg14161344  | chr17 | 48736189  |               | 1.14E-12 | -0.3596 |       |
| cg00475490* | chr11 | 86517110  | PRSS23        | 1.17E-12 | -0.3225 | D     |
| cg24629589  | chr1  | 11199365  | MTOR          | 1.20E-12 | 0.0000  |       |
| cg01998750  | chr3  | 69434842  | FRMD4B        | 1.27E-12 | 0.7932  |       |
| cg10750182  | chr10 | 73497514  | C10orf105     | 1.30E-12 | -0.3087 | D     |
| cg07667906  | chr14 | 106329752 | IGHJ6         | 1.41E-12 | -0.6702 |       |
| cg02273797  | chr1  | 33191153  | RP11-114B7.6  | 1.43E-12 | 0.2379  |       |
| cg25471032  | chr10 | 4984133   | AKR1C1        | 1.83E-12 | -1.0868 |       |
| cg21983799  | chr22 | 42810199  |               | 2.15E-12 | -0.2830 |       |
| cg09834951  | chr19 | 1265877   |               | 3.39E-12 | -0.8622 | D     |
| cg07949895  | chr1  | 33191557  | RP11-114B7.6  | 3.77E-12 | -0.3282 |       |
| cg21602518  | chr8  | 134394900 |               | 4.14E-12 | -0.2021 |       |
| cg12465678  | chr1  | 27953336  | FGR           | 4.33E-12 | 0.4015  |       |
| cg02426623  | chr12 | 3259078   | TSPAN9        | 4.35E-12 | -0.8734 |       |
| cg17851614  | chr1  | 223599228 |               | 4.52E-12 | -0.2792 |       |
| cg27277419  | chr1  | 19409764  | UBR4          | 4.71E-12 | 0.7103  |       |
| cg19352842  | chr16 | 70729655  |               | 5.03E-12 | 0.0277  |       |
| cg01884217  | chr17 | 48736199  |               | 5.12E-12 | -0.5609 |       |
| cg08035323  | chr2  | 9843525   | RP11-521D12.2 | 5.54E-12 | 0.5155  | R     |
| cg03863418  | chr6  | 107187120 | U6            | 5.91E-12 | -0.0817 |       |
| cg11916067  | chr19 | 17909115  | B3GNT3        | 6.29E-12 | -0.7455 |       |
| cg24752487  | chr2  | 38324188  | CYP1B1        | 6.30E-12 | -1.2154 |       |
| cg26779770  | chr5  | 176421823 | UIMC1         | 6.59E-12 | 0.0538  |       |
| cg20294744  | chr13 | 48978285  |               | 7.55E-12 | -0.3089 |       |
| cg17738628  | chr15 | 67155520  |               | 7.98E-12 | -0.1999 | D     |
| cg05964212  | chr3  | 48936979  | SLC25A20      | 8.06E-12 | 0.5715  |       |
| cg11827976  | chr3  | 177494197 |               | 8.65E-12 | -0.1871 |       |
| cg14699161  | chr2  | 89165403  | IGKJ5         | 8.86E-12 | 0.6016  |       |
| cg25146488  | chr8  | 129195790 |               | 9.02E-12 | 0.4833  |       |
| cg04144218  | chr7  | 69559531  |               | 9.18E-12 | -0.7685 |       |
| cg12298464  | chr20 | 32650873  | RALY          | 9.26E-12 | 0.5217  |       |
| cg21502250  | chr12 | 122297313 | HPD           | 9.86E-12 | -0.5275 |       |
| cg10111629  | chr1  | 113067124 | ST7L          | 1.01E-11 | -0.2244 |       |
| cg01294327  | chr19 | 2291373   |               | 1.03E-11 | -0.8751 |       |
| cg17619755  | chr6  | 31760629  | VAR5          | 1.25E-11 | 1.6842  |       |
| cg10258214  | chr14 | 106330534 | IGHJ6         | 1.33E-11 | -0.1500 |       |
| cg22454558  | chr22 | 28123229  |               | 1.33E-11 | -1.1088 |       |
| cg04802238  | chr16 | 87873610  |               | 1.63E-11 | -0.8153 |       |



|             |       |           |               |          |         |          |
|-------------|-------|-----------|---------------|----------|---------|----------|
| cg15735209  | chr2  | 178100898 | NFE2L2        | 1.66E-11 | -0.2634 |          |
| cg02621481  | chr13 | 50931836  | DLEU1         | 1.93E-11 | -0.4519 |          |
| cg27271698  | chr14 | 106330538 | IGHJ6         | 1.96E-11 | -0.1556 | D        |
| cg23594345  | chr14 | 106329607 | IGHJ6         | 2.05E-11 | -0.3915 |          |
| cg20264482  | chr8  | 57472110  | RP11-16M8.2   | 2.07E-11 | 0.9456  |          |
| cg05722069  | chr17 | 70600952  |               | 2.11E-11 | -0.6029 |          |
| cg21489622  | chr6  | 143247772 | HIVEP2        | 2.14E-11 | 0.2829  |          |
| cg22440155  | chr19 | 2664262   | GNG7          | 2.39E-11 | 0.3393  |          |
| cg11554391  | chr5  | 321320    | AHRR          | 2.41E-11 | -0.2133 | T        |
| cg13074055  | chr14 | 106329206 |               | 2.64E-11 | -0.6402 |          |
| cg26361535  | chr8  | 144576604 | ZC3H3         | 2.73E-11 | -1.3209 | SB, S    |
| cg12507207  | chr1  | 111771121 | CHI3L2        | 2.98E-11 | -0.0429 |          |
| cg22779218  | chr3  | 17055381  |               | 3.70E-11 | -0.0864 |          |
| cg24859433  | chr6  | 30720203  | IER3          | 4.53E-11 | -1.3082 | S, SB, D |
| cg01208318  | chr14 | 106329652 | IGHJ6         | 5.36E-11 | -0.2204 |          |
| cg00806214  | chr16 | 521912    |               | 5.66E-11 | -0.1182 |          |
| cg08565469  | chr19 | 2291389   |               | 5.97E-11 | -0.6050 |          |
| cg05866990  | chr11 | 34592252  | RP11-350D17.2 | 6.41E-11 | 0.5866  |          |
| cg02119598  | chr16 | 75096992  | ZNRF1         | 6.87E-11 | 0.4451  |          |
| cg14179164  | chr14 | 75084315  | CTD-2207P18.2 | 7.63E-11 | -0.0669 |          |
| cg21464206  | chr2  | 113448586 |               | 8.12E-11 | 0.6812  |          |
| cg05533761  | chr11 | 86437953  | CTD-2005H7.2  | 8.38E-11 | -1.0448 | D        |
| cg26182999  | chr22 | 36866904  | TXN2          | 8.47E-11 | 0.0567  |          |
| cg16207944  | chr14 | 106331592 | IGHJ4         | 8.51E-11 | -0.0812 | D        |
| cg07251887* | chr17 | 73641809  |               | 8.75E-11 | -0.6380 | D        |
| cg09655257  | chr7  | 100977394 |               | 9.02E-11 | 0.5903  |          |
| cg27381834  | chr1  | 207039040 | IL20          | 9.72E-11 | 0.0598  |          |
| cg18228985  | chr22 | 30018031  |               | 9.80E-11 | 0.6569  |          |
| cg14624207  | chr11 | 68142198  |               | 1.13E-10 | -0.0069 | SB       |
| cg05533453  | chr1  | 42014022  | HIVEP3        | 1.25E-10 | 0.5086  |          |
| cg01513913  | chr14 | 106329158 |               | 1.26E-10 | -0.2211 |          |
| cg03686998  | chr14 | 106330224 | IGHJ6         | 1.29E-10 | 0.0472  | D        |
| cg09328068  | chr13 | 44749282  | C13orf44-AS1  | 1.35E-10 | -0.8607 |          |
| cg08857355  | chr11 | 30608471  | MPPED2        | 1.41E-10 | 1.1382  |          |
| cg26366543  | chr16 | 55873180  |               | 1.44E-10 | -0.0052 |          |
| cg02100008  | chr4  | 56658357  |               | 1.47E-10 | -0.3732 |          |
| cg10880599  | chr14 | 65408480  |               | 1.51E-10 | -0.5475 |          |
| cg18307140  | chr17 | 76303857  |               | 1.58E-10 | -0.1276 |          |
| cg25001882  | chr14 | 78619077  |               | 1.60E-10 | 0.0160  | D        |
| cg14053807  | chr3  | 183030231 | MCF2L2        | 1.67E-10 | -0.9238 |          |
| cg26401796  | chr12 | 5574420   | NTF3          | 1.70E-10 | -1.5612 |          |
| cg15393221  | chr19 | 40919485  | PRX           | 1.84E-10 | 0.5426  |          |

|             |       |           |               |          |         |              |
|-------------|-------|-----------|---------------|----------|---------|--------------|
| cg27215690  | chr1  | 25344157  |               | 1.92E-10 | -0.6681 | D            |
| cg24680415  | chr17 | 70358572  |               | 2.17E-10 | 0.0100  |              |
| cg08959878  | chr2  | 2710266   |               | 2.33E-10 | 0.8669  |              |
| cg25770637  | chr1  | 110361277 |               | 2.49E-10 | 0.2389  |              |
| cg23382784  | chr10 | 4729038   |               | 2.49E-10 | 0.1399  |              |
| cg02725110  | chr8  | 134698294 |               | 2.53E-10 | 0.7717  |              |
| cg26039954  | chr1  | 16220025  |               | 2.61E-10 | -0.2323 |              |
| cg16109875  | chr22 | 29313292  | ZNRF3         | 2.65E-10 | -0.5076 |              |
| cg12615852  | chr14 | 106330121 | IGHJ6         | 2.71E-10 | -0.2039 |              |
| cg17625893  | chr14 | 106322849 | IGHM          | 2.76E-10 | -0.1351 |              |
| cg10615686  | chr1  | 234677343 |               | 2.79E-10 | -0.0345 |              |
| cg16336872  | chr5  | 435267    | AHRR          | 2.89E-10 | 0.0545  |              |
| cg21148871  | chr4  | 87051743  | MAPK10        | 3.06E-10 | 0.0502  |              |
| cg01835527  | chr5  | 148214451 |               | 3.07E-10 | -0.3884 |              |
| cg21983824  | chr21 | 43175471  | RIPK4         | 3.15E-10 | -0.3580 |              |
| cg04939326  | chr11 | 73278053  | FAM168A       | 3.20E-10 | -0.1874 |              |
| cg14049087  | chr2  | 60619220  | AC007381.2    | 3.21E-10 | 0.4537  |              |
| cg14391737* | chr11 | 86513429  | PRSS23        | 3.25E-10 | -0.9887 | D            |
| cg03970350  | chr22 | 31003010  | PES1          | 3.37E-10 | 0.4084  |              |
| cg03739287  | chr2  | 38471584  |               | 3.42E-10 | -0.6980 |              |
| cg24021808  | chr13 | 40805588  |               | 3.43E-10 | 1.7283  |              |
| cg27187848  | chr5  | 140888834 |               | 3.51E-10 | 0.5585  |              |
| cg11191134  | chr5  | 131631098 | SLC22A4       | 3.51E-10 | 0.6829  |              |
| cg12803068  | chr7  | 45002919  | MYO1G         | 3.55E-10 | 1.2489  | S, SB, Wk, D |
| cg24838345  | chr8  | 125737353 | MTSS1         | 3.57E-10 | -0.1898 | SB, S, D     |
| cg00378510  | chr19 | 2291020   |               | 3.90E-10 | -1.0520 | T            |
| cg23678985  | chr17 | 70514539  | AC007639.1    | 4.04E-10 | -0.3472 |              |
| cg09842685  | chr12 | 4492769   |               | 4.15E-10 | -0.1693 | D            |
| cg03574656  | chr2  | 24327900  |               | 4.60E-10 | -0.8393 |              |
| cg21322436  | chr7  | 145812842 | CNTNAP2       | 4.68E-10 | -0.1351 | S, SB, D     |
| cg25305703  | chr8  | 128378218 | RP11-382A18.2 | 5.18E-10 | -0.2550 | D            |
| cg03349776  | chr2  | 113448464 |               | 5.54E-10 | 0.6480  |              |
| cg13038618  | chr14 | 77467391  |               | 5.66E-10 | 0.1955  | Sk           |
| cg07986378  | chr12 | 11898284  | ETV6          | 5.89E-10 | 0.1421  | D            |
| cg15494987  | chr11 | 69150514  |               | 6.05E-10 | -0.7021 |              |
| cg23436468  | chr19 | 6135321   | ACSBG2        | 6.15E-10 | -1.6750 |              |
| cg06635952  | chr2  | 70025869  | ANXA4         | 6.79E-10 | 0.3999  | Sk, Wk       |
| cg11152412  | chr15 | 74927688  | CLK3          | 7.26E-10 | -0.1402 | S            |
| cg23874600  | chr2  | 234601954 | UGT1A6        | 7.26E-10 | -0.6583 |              |
| cg09932507  | chr17 | 47643410  | RP5-1029K10.2 | 7.91E-10 | 0.4574  |              |
| cg01389386  | chr16 | 70471055  | ST3GAL2       | 8.27E-10 | -0.2800 |              |
| cg08601520  | chr17 | 32488847  |               | 8.80E-10 | 0.1687  |              |
| cg01901332  | chr11 | 75031054  |               | 8.81E-10 | -0.0523 | SB, S, D     |
| cg18340983  | chr11 | 72941691  | P2RY2         | 8.89E-10 | -0.5435 |              |

|            |       |           |               |          |         |           |
|------------|-------|-----------|---------------|----------|---------|-----------|
| cg00073090 | chr19 | 1265879   |               | 9.13E-10 | -0.6963 | D         |
| cg26271591 | chr2  | 178125956 | NFE2L2        | 9.22E-10 | -0.7507 | SB, D     |
| cg19623982 | chr1  | 44951427  | RNF220        | 9.23E-10 | 0.7765  |           |
| cg24797066 | chr20 | 48407084  |               | 9.64E-10 | 0.5788  | D         |
| cg17651613 | chr8  | 143111540 |               | 9.66E-10 | -0.4614 |           |
| cg02506908 | chr12 | 122297408 | HPD           | 1.08E-09 | -0.1350 |           |
| cg20328799 | chr2  | 120985492 |               | 1.12E-09 | 0.7739  |           |
| cg20408276 | chr2  | 38300586  | CYP1B1        | 1.16E-09 | -0.7414 | T         |
| cg05748997 | chr12 | 117524737 |               | 1.17E-09 | -0.3597 |           |
| cg15241876 | chr22 | 37257594  | CTA-833B7.2   | 1.21E-09 | 0.0674  |           |
| cg12876356 | chr1  | 92946825  | GFI1          | 1.28E-09 | -0.6412 | S, SB, D  |
| cg24310904 | chr21 | 47421270  | COL6A1        | 1.36E-09 | -0.5100 |           |
| cg06831571 | chr11 | 34592196  | RP11-350D17.2 | 1.37E-09 | 1.1227  |           |
| cg14521421 | chr11 | 8862019   | ST5           | 1.39E-09 | -0.4706 |           |
| cg09010260 | chr12 | 54842484  | RP11-753H16.5 | 1.39E-09 | -0.2732 | D         |
| cg12009405 | chr6  | 148651331 |               | 1.43E-09 | -0.9476 |           |
| cg04061293 | chr12 | 90341279  | RP11-654D12.2 | 1.44E-09 | -0.4823 |           |
| cg08331284 | chr10 | 80841582  | ZMIZ1         | 1.44E-09 | -0.5242 |           |
| cg10644896 | chr6  | 22147559  | RP1-67M12.2   | 1.50E-09 | 0.7497  |           |
| cg08902266 | chr9  | 97635614  | C9orf3        | 1.54E-09 | -0.3687 |           |
| cg17076543 | chr12 | 133319292 |               | 1.55E-09 | -0.5845 |           |
| cg13119036 | chr2  | 28492416  |               | 1.57E-09 | -0.5894 |           |
| cg13580248 | chr17 | 79882629  | MAFG          | 1.60E-09 | 0.4779  |           |
| cg07278718 | chr11 | 113932635 | ZBTB16        | 1.62E-09 | 0.8787  |           |
| cg14229348 | chr11 | 69089471  |               | 1.74E-09 | -0.0898 |           |
| cg20433154 | chr5  | 325118    | AHRR          | 1.77E-09 | -0.0166 |           |
| cg13036223 | chr5  | 78552304  |               | 1.80E-09 | -0.1963 |           |
| cg09156598 | chr1  | 12192620  | TNFRSF8       | 1.88E-09 | -0.5465 |           |
| cg25639601 | chr4  | 157695723 | PDGFC         | 1.88E-09 | 0.0094  |           |
| cg26673040 | chr2  | 67157193  | AC007403.2    | 1.90E-09 | -1.0573 | D         |
| cg11207515 | chr7  | 146904205 |               | 1.91E-09 | 0.6584  | SB, Wk, D |
| cg07812250 | chr16 | 15601462  | RP11-1021N1.1 | 1.92E-09 | -0.8364 | D         |
| cg01370594 | chr20 | 47603732  |               | 1.95E-09 | 0.1621  |           |
| cg02223351 | chr16 | 66402367  | CDH5          | 2.06E-09 | 0.5185  | M         |
| cg00866399 | chr2  | 73148052  |               | 2.15E-09 | 0.7150  |           |
| cg15853512 | chr5  | 42565352  | GHR           | 2.20E-09 | -0.9067 |           |
| cg08163642 | chr20 | 16512131  | KIF16B        | 2.29E-09 | -0.2314 |           |
| cg04547740 | chr22 | 29313235  | ZNRF3         | 2.35E-09 | -1.0729 |           |
| cg12253911 | chr10 | 79785946  |               | 2.36E-09 | -0.2517 |           |
| cg21794943 | chr2  | 99872952  | LYG2          | 2.38E-09 | 0.1021  |           |
| cg20311481 | chr20 | 4206624   |               | 2.43E-09 | -0.1832 |           |

|            |       |           |                   |          |         |          |
|------------|-------|-----------|-------------------|----------|---------|----------|
| cg22311669 | chr16 | 30466567  | Y_RNA             | 2.46E-09 | -0.4178 |          |
| cg26274046 | chr22 | 29312841  | ZNRF3             | 2.53E-09 | -0.6842 |          |
| cg18316974 | chr1  | 92947035  |                   | 2.61E-09 | -1.1318 | SB, S    |
| cg13914612 | chr2  | 60562918  |                   | 2.62E-09 | 0.9545  |          |
| cg26193418 | chr7  | 33973655  |                   | 2.67E-09 | -0.2462 |          |
| cg11439308 | chr15 | 99974332  |                   | 2.72E-09 | -0.2380 |          |
| cg23686030 | chr11 | 85555920  |                   | 2.92E-09 | -0.4937 |          |
| cg07756788 | chr13 | 30532829  |                   | 2.98E-09 | -0.3286 |          |
| cg05009104 | chr7  | 45002980  |                   | 3.02E-09 | 0.4572  | D        |
| cg01309527 | chr6  | 44024686  | RP5-<br>1120P11.1 | 3.07E-09 | -0.0131 |          |
| cg10956333 | chr3  | 53294961  |                   | 3.08E-09 | -0.2414 |          |
| cg00523308 | chr22 | 44658793  |                   | 3.14E-09 | -0.5973 |          |
| cg16630940 | chr2  | 238602811 |                   | 3.24E-09 | 0.6289  |          |
| cg02583484 | chr12 | 54677008  | HNRNPA1           | 3.25E-09 | -0.3372 | SB       |
| cg03995533 | chr16 | 11194243  | CLEC16A           | 3.30E-09 | -0.5403 |          |
| cg03061612 | chr20 | 30496009  |                   | 3.38E-09 | 0.1235  |          |
| cg03285383 | chr8  | 27204380  | PTK2B             | 3.39E-09 | -0.7354 |          |
| cg17804100 | chr1  | 42277934  | HIVEP3            | 3.55E-09 | 0.5587  |          |
| cg27116072 | chr16 | 84675013  |                   | 3.96E-09 | 0.2963  |          |
| cg02272667 | chr7  | 1922866   |                   | 3.98E-09 | 0.4255  |          |
| cg12248830 | chr5  | 16596975  |                   | 3.98E-09 | -0.7967 |          |
| cg10664272 | chr2  | 85638053  | CAPG              | 4.01E-09 | -0.3310 |          |
| cg12075928 | chr8  | 141801307 |                   | 4.02E-09 | -0.3960 | SB       |
| cg25520710 | chr20 | 45981300  | ZMYND8            | 4.03E-09 | -1.9129 |          |
| cg19885130 | chr11 | 68146832  |                   | 4.05E-09 | 0.3187  | D        |
| cg27323424 | chr14 | 75083966  | CTD-<br>2207P18.2 | 4.18E-09 | -0.1981 |          |
| cg04885881 | chr1  | 11123118  | SRM               | 4.25E-09 | -0.1000 | S, SB, D |
| cg01868616 | chr11 | 75041600  |                   | 4.30E-09 | -0.5209 |          |
| cg24179132 | chr22 | 38012611  | GGA1              | 4.33E-09 | -0.4381 |          |
| cg04604309 | chr4  | 89525897  | HERC3             | 4.36E-09 | 0.3354  |          |
| cg02812408 | chr6  | 25153566  | CMAHP             | 4.45E-09 | -0.0978 |          |
| cg05345286 | chr6  | 41606641  |                   | 4.49E-09 | 0.9347  |          |
| cg05157376 | chr1  | 92781750  | RPAP2             | 4.51E-09 | -0.2207 | D        |
| cg17880994 | chr1  | 42655725  | FOXJ3             | 4.58E-09 | -0.1082 |          |
| cg02174510 | chr20 | 19783309  | RP1-<br>122P22.2  | 4.61E-09 | -0.4022 |          |
| cg27043548 | chr14 | 99567309  |                   | 4.78E-09 | -0.4205 |          |
| cg23446377 | chr4  | 102127231 | PPP3CA            | 4.80E-09 | 0.9865  |          |
| cg09565444 | chr4  | 16266666  | RP11-<br>783N5.1  | 5.02E-09 | 0.7273  |          |
| cg12149609 | chr20 | 42816600  | JPH2              | 5.17E-09 | 1.2686  |          |
| cg13413384 | chr9  | 137302231 | RXRA              | 5.40E-09 | -0.0681 |          |
| cg02670637 | chr1  | 56184693  | RP11-<br>466L17.1 | 5.65E-09 | -0.1699 |          |
| cg04145765 | chr8  | 67039461  | TRIM55            | 5.76E-09 | -0.0124 |          |

|            |       |           |               |          |         |              |
|------------|-------|-----------|---------------|----------|---------|--------------|
| cg11401937 | chr3  | 183689786 |               | 5.99E-09 | -0.4146 |              |
| cg06441533 | chr14 | 65409905  | GPX2          | 6.08E-09 | -0.8826 |              |
| cg14891022 | chr22 | 37625461  |               | 6.20E-09 | 0.6802  |              |
| cg09848700 | chr10 | 79955693  |               | 6.26E-09 | -0.4209 |              |
| cg25431484 | chr11 | 34592283  | RP11-350D17.2 | 6.33E-09 | 0.2651  |              |
| cg15722293 | chr1  | 212803761 |               | 6.36E-09 | 1.0690  |              |
| cg14080071 | chr8  | 82009570  | PAG1          | 6.41E-09 | 0.2756  |              |
| cg02898994 | chr20 | 2361440   | TGM6          | 6.63E-09 | -0.5740 |              |
| cg08048564 | chr12 | 123365343 |               | 6.90E-09 | 0.1123  |              |
| cg27212548 | chr1  | 5988084   | NPHP4         | 6.91E-09 | -0.7650 |              |
| cg13423180 | chr3  | 24563679  |               | 6.95E-09 | 0.5898  |              |
| cg13762385 | chr10 | 75666539  |               | 6.96E-09 | 0.4963  |              |
| cg08434692 | chr17 | 73086066  | SLC16A5       | 7.06E-09 | -0.6385 |              |
| cg04018738 | chr6  | 31760616  | VARS          | 7.18E-09 | 0.4877  |              |
| cg25949550 | chr7  | 145814306 | CNTNAP2       | 7.19E-09 | -0.0888 | S, SB, Wk, D |
| cg18387338 | chr7  | 26591438  | AC004947.2    | 7.67E-09 | -0.1000 |              |
| cg27528787 | chr9  | 130939119 | CIZ1          | 7.83E-09 | -0.7320 |              |
| cg15916554 | chr15 | 31508820  | RP11-16E12.1  | 7.96E-09 | -0.0336 | Sk           |
| cg04067772 | chr10 | 79221232  |               | 7.97E-09 | -0.3176 |              |
| cg18417941 | chr1  | 59841351  | FGGY          | 8.24E-09 | -0.4700 |              |
| cg12778716 | chr18 | 6995012   |               | 8.37E-09 | 0.1579  |              |
| cg11770823 | chr3  | 72170114  |               | 8.38E-09 | 0.3429  |              |
| cg11514839 | chr2  | 16384587  | AC010745.1    | 8.51E-09 | -0.8809 |              |
| cg03001863 | chr20 | 36037325  |               | 8.53E-09 | -0.1051 |              |
| cg20580946 | chr12 | 103293039 | PAH           | 8.58E-09 | -0.6501 |              |
| cg04086097 | chr7  | 128580792 | IRF5          | 8.60E-09 | 0.7285  |              |
| cg13358038 | chr12 | 1023702   | RAD52         | 8.74E-09 | 0.5946  |              |
| cg19156729 | chr9  | 124452422 |               | 8.75E-09 | -0.7928 |              |
| cg22157525 | chr5  | 149900962 |               | 8.78E-09 | -0.6263 |              |
| cg26192689 | chr2  | 206730773 |               | 8.96E-09 | -0.1392 |              |
| cg18974499 | chr8  | 142416513 | PTP4A3        | 9.09E-09 | -0.8479 |              |
| cg19372602 | chr1  | 156116207 |               | 9.31E-09 | -0.3908 |              |
| cg05498503 | chr6  | 143224021 | HIVEP2        | 1.01E-08 | 1.0188  |              |
| cg02423587 | chr1  | 36059379  |               | 1.04E-08 | -0.4570 |              |
| cg19100778 | chr11 | 116873738 | SIK3          | 1.05E-08 | 0.5066  |              |
| cg25515197 | chr15 | 70762847  |               | 1.06E-08 | 0.0654  |              |
| cg21869609 | chr19 | 2291613   |               | 1.08E-08 | -0.9813 | Sk           |
| cg12649475 | chr17 | 62248511  |               | 1.12E-08 | -0.3097 |              |
| cg07622193 | chr19 | 42701920  |               | 1.15E-08 | 0.0502  |              |
| cg25096570 | chr14 | 74937693  |               | 1.18E-08 | -0.5545 |              |
| cg00326946 | chr8  | 27221307  | PTK2B         | 1.18E-08 | 2.0639  |              |
| cg10841124 | chr5  | 433274    |               | 1.26E-08 | 0.3752  | Sk           |
| cg10171659 | chr7  | 73723813  | CLIP2         | 1.26E-08 | -0.8810 |              |

|             |       |           |               |          |         |       |
|-------------|-------|-----------|---------------|----------|---------|-------|
| cg22551157  | chr12 | 66342368  | RP11-366L20.3 | 1.27E-08 | -0.3870 | D     |
| cg04139874  | chr11 | 103734503 | RP11-563P16.1 | 1.31E-08 | -0.5708 |       |
| cg24871922  | chr8  | 48556931  | KIAA0146      | 1.31E-08 | 0.6431  |       |
| cg15310518  | chr14 | 106330520 | IGHJ6         | 1.31E-08 | 0.1146  | D     |
| cg10765427  | chr19 | 17005225  |               | 1.33E-08 | -0.1880 | D     |
| cg22402988  | chr1  | 110261127 |               | 1.41E-08 | -0.3348 |       |
| cg05396397  | chr1  | 11908164  | NPPA          | 1.42E-08 | 1.0899  |       |
| cg11087049  | chr14 | 51296586  | NIN           | 1.45E-08 | 0.6725  |       |
| cg07727360  | chr10 | 71884547  | AIFM2         | 1.50E-08 | -0.4561 |       |
| cg03625444  | chr12 | 125244660 |               | 1.51E-08 | 0.4431  |       |
| cg09338374  | chr22 | 39888390  |               | 1.56E-08 | 0.9069  | D     |
| cg04697629  | chr1  | 221871655 |               | 1.57E-08 | -0.1805 |       |
| cg22479453  | chr1  | 110367354 |               | 1.58E-08 | -0.5864 |       |
| cg01978215  | chr2  | 145078303 | GTDC1         | 1.63E-08 | 0.1859  |       |
| cg18337222  | chr3  | 99595254  | FILIP1L       | 1.64E-08 | 0.6919  |       |
| cg25135778  | chr20 | 60736870  | SS18L1        | 1.65E-08 | -0.2419 |       |
| cg09594069  | chr7  | 37956906  | SFRP4         | 1.70E-08 | 0.2682  |       |
| cg06372633  | chr9  | 124366728 |               | 1.72E-08 | 0.8994  |       |
| cg23538749  | chr2  | 231615143 | CAB39         | 1.75E-08 | 0.3853  |       |
| cg25349729  | chr1  | 214560352 | PTPN14        | 1.85E-08 | -1.0975 |       |
| cg00501876  | chr3  | 39193251  | CSRNP1        | 1.86E-08 | -1.0885 | S     |
| cg12081942  | chr8  | 98001492  |               | 1.88E-08 | 0.7640  |       |
| cg24343150  | chr6  | 114145895 | RP1-249H1.2   | 1.89E-08 | -0.2499 |       |
| cg25075664  | chr3  | 14366362  |               | 1.89E-08 | -0.3578 |       |
| cg13494026  | chr19 | 53118759  | ZNF83         | 1.93E-08 | -0.0394 |       |
| cg06581475* | chr15 | 75020202  |               | 1.98E-08 | -0.4493 |       |
| cg16540258  | chr12 | 27975175  |               | 2.01E-08 | 0.4214  |       |
| cg04606771  | chr4  | 169752455 | PALLD         | 2.04E-08 | 0.5099  |       |
| cg06161814  | chr7  | 37956963  | SFRP4         | 2.18E-08 | 0.6730  |       |
| cg16264724  | chr16 | 30466524  | Y_RNA         | 2.21E-08 | -0.7397 |       |
| cg04916091  | chr19 | 17958647  | JAK3          | 2.22E-08 | 0.9507  |       |
| cg26529655  | chr5  | 424371    |               | 2.26E-08 | -0.1041 | Sk, S |
| cg27102138  | chr3  | 136884112 |               | 2.27E-08 | -0.2153 |       |
| cg10355819  | chr9  | 124226279 | GGTA1P        | 2.30E-08 | -0.3957 |       |
| cg03913921  | chr7  | 120496827 | TSPAN12       | 2.45E-08 | 0.5982  |       |
| cg07660204  | chr4  | 3391175   | RGS12         | 2.49E-08 | 0.5063  |       |
| cg00030296  | chr17 | 75318732  | 9-Sep         | 2.53E-08 | 0.3800  |       |
| cg17484029  | chr2  | 38340347  | CYP1B1        | 2.63E-08 | 0.3528  |       |
| cg26332838  | chr12 | 55840205  | RP11-110A12.2 | 2.67E-08 | -0.0706 |       |
| cg08902828  | chr5  | 400832    | AHRR          | 2.80E-08 | -0.0884 |       |
| cg23564780  | chr11 | 65058365  |               | 2.82E-08 | 0.3054  |       |
| cg16455573  | chr4  | 159090971 | RP11-597D13.9 | 2.87E-08 | 1.6356  |       |
| cg20295214  | chr1  | 206226794 |               | 2.88E-08 | -0.0822 | S     |

|            |       |           |               |          |         |    |
|------------|-------|-----------|---------------|----------|---------|----|
| cg03208161 | chr5  | 71187748  |               | 2.88E-08 | -0.3811 |    |
| cg07047532 | chr4  | 166435972 |               | 2.93E-08 | -0.0726 |    |
| cg03862943 | chr14 | 96520706  | C14orf132     | 2.96E-08 | 0.0826  |    |
| cg05161004 | chr14 | 76902522  | ESRRB         | 3.05E-08 | -0.1463 |    |
| cg21647182 | chr2  | 1657483   |               | 3.09E-08 | -0.0937 |    |
| cg13705457 | chr11 | 34592254  | RP11-350D17.2 | 3.17E-08 | 1.3141  |    |
| cg00136212 | chr21 | 42513481  | LINC00323     | 3.18E-08 | -0.0155 |    |
| cg05599158 | chr1  | 11380423  |               | 3.18E-08 | 0.7812  |    |
| cg02536086 | chr15 | 48093535  |               | 3.20E-08 | -0.4764 |    |
| cg06035270 | chr16 | 87312465  | C16orf95      | 3.25E-08 | 0.3005  |    |
| cg03547355 | chr1  | 227003060 |               | 3.25E-08 | -0.7144 | SB |
| cg11320225 | chr1  | 161709963 |               | 3.39E-08 | 0.3504  |    |
| cg10174146 | chr10 | 6540795   |               | 3.42E-08 | 0.3242  |    |
| cg04097722 | chr19 | 18637236  |               | 3.43E-08 | -0.4484 |    |
| cg10860063 | chr10 | 3921828   |               | 3.46E-08 | -0.2630 |    |
| cg01380884 | chr15 | 74923934  | EDC3          | 3.50E-08 | -0.3717 |    |
| cg05753553 | chr17 | 2689486   | RAP1GAP2      | 3.60E-08 | 0.4081  |    |
| cg03296424 | chr17 | 19646818  | ALDH3A1       | 3.60E-08 | -0.1707 |    |
| cg12547807 | chr1  | 9473751   |               | 3.72E-08 | -0.7501 |    |
| cg06451566 | chr6  | 107187275 | U6            | 3.74E-08 | -0.3211 |    |
| cg13827179 | chr1  | 22668639  |               | 3.76E-08 | 1.4985  |    |
| cg25421530 | chr10 | 97200987  | SORBS1        | 3.79E-08 | 0.1145  |    |
| cg02992067 | chr16 | 53856169  | FTO           | 3.82E-08 | -0.4290 |    |
| cg10334778 | chr22 | 38711498  | CSNK1E        | 3.94E-08 | 0.4301  |    |
| cg21223535 | chr6  | 1973366   |               | 4.03E-08 | 1.0096  |    |
| cg00862930 | chr4  | 7299445   |               | 4.09E-08 | 0.3595  |    |
| cg23942160 | chr16 | 10719960  |               | 4.14E-08 | -0.0335 |    |
| cg09966085 | chr18 | 42588939  |               | 4.32E-08 | -0.4760 |    |
| cg26973354 | chr10 | 5085889   | AKR1C3        | 4.43E-08 | -0.2605 |    |
| cg26927232 | chr17 | 2135631   | AL450226.2    | 4.59E-08 | -0.1129 |    |
| cg10960240 | chr10 | 71878112  | AIFM2         | 4.59E-08 | -1.0459 |    |
| cg03855388 | chr11 | 68580018  |               | 4.69E-08 | -0.5675 |    |
| cg05498478 | chr15 | 76214626  |               | 4.69E-08 | -0.3783 |    |
| cg20059928 | chr15 | 40361485  |               | 4.71E-08 | -0.7922 |    |
| cg07907563 | chr11 | 47216568  |               | 4.74E-08 | -0.6941 |    |
| cg18419251 | chr4  | 38117499  | TBC1D1        | 4.78E-08 | -0.5206 |    |
| cg12030962 | chr11 | 69038610  |               | 4.81E-08 | -0.1730 |    |
| cg18163683 | chr2  | 38324984  | CYP1B1        | 4.97E-08 | -0.9319 |    |
| cg00151672 | chr3  | 12987948  | IQSEC1        | 4.98E-08 | -0.1328 |    |
| cg05107149 | chr22 | 35781095  |               | 5.01E-08 | -0.0705 |    |
| cg02595713 | chr20 | 34716520  | EPB41L1       | 5.01E-08 | -0.4550 |    |
| cg07893176 | chr1  | 171110609 |               | 5.08E-08 | -0.8799 |    |
| cg11025877 | chr3  | 134202227 | ANAPC13       | 5.15E-08 | 1.4108  |    |
| cg23212751 | chr1  | 44401433  | ARTN          | 5.26E-08 | -0.7519 |    |
| cg23754392 | chr10 | 22611454  | BMI1          | 5.31E-08 | 0.7285  |    |

|            |       |           |                 |          |         |
|------------|-------|-----------|-----------------|----------|---------|
| cg20985847 | chr11 | 95277427  |                 | 5.43E-08 | -0.0977 |
| cg26368490 | chr3  | 45860172  |                 | 5.53E-08 | -0.1884 |
| cg14087413 | chr9  | 35848330  |                 | 5.54E-08 | -0.0917 |
| cg13054523 | chr17 | 81055722  |                 | 5.56E-08 | 0.0335  |
| cg07375207 | chr16 | 717419    | RHOT2           | 5.67E-08 | -0.4759 |
| cg16752482 | chr1  | 209830616 |                 | 5.68E-08 | 0.3780  |
| cg02385153 | chr5  | 404766    | AHRR            | 5.73E-08 | 0.2047  |
| cg14614490 | chr9  | 123637816 | PHF19           | 5.78E-08 | -0.0122 |
| cg05711474 | chr3  | 57937462  |                 | 5.85E-08 | 0.7428  |
| cg25322672 | chr9  | 97624250  | C9orf3          | 5.89E-08 | 0.4645  |
| cg11298246 | chr13 | 22784439  |                 | 6.02E-08 | -0.4537 |
| cg22768487 | chr22 | 46770253  |                 | 6.04E-08 | 0.2587  |
| cg10125703 | chr19 | 49228647  |                 | 6.08E-08 | 0.4391  |
| cg00227225 | chr15 | 48011091  | SEMA6D          | 6.09E-08 | 0.2685  |
| cg13371045 | chr11 | 3395836   | ZNF195          | 6.11E-08 | -0.0290 |
| cg20082547 | chr20 | 2361564   | TGM6            | 6.19E-08 | -0.4060 |
| cg07391985 | chr2  | 219233678 | AC021016.6      | 6.22E-08 | 0.4461  |
| cg10357657 | chr19 | 17958633  | JAK3            | 6.24E-08 | 0.6920  |
| cg01780984 | chr17 | 79058859  | BAIAP2          | 6.28E-08 | -0.3672 |
| cg25481455 | chr6  | 22147551  | RP1-<br>67M12.2 | 6.30E-08 | 1.4232  |
| cg18259487 | chr7  | 2473859   | CHST12          | 6.38E-08 | -0.7107 |
| cg09303399 | chr14 | 106330947 | IGHJ6           | 6.41E-08 | 0.4173  |
| cg22891595 | chr3  | 193570256 |                 | 6.45E-08 | 0.2227  |
| cg09218334 | chr11 | 1536046   |                 | 6.51E-08 | -0.3623 |

---



**Supplementary Table 2. DMS associated with ND.** 22 DMS were detected in ND EWAS. S = (5), B = (1), SB = (2), T = (3), Wk = (4). \* DMS also detected in SS analysis. Effect =  $(\text{Mean}\beta_{\text{ND}} - \text{Mean}\beta_{\text{non-ND}}) / \text{Sd}$ .

| CpG Name    | Chromosome | Position  | Gene Annotation | P-value  | Effect  | Literature      |
|-------------|------------|-----------|-----------------|----------|---------|-----------------|
|             |            |           |                 |          |         | References      |
| cg21566642* | chr2       | 233284661 | ALPPL2          | 5.71E-23 | -0.8035 | S, SB, T, D     |
| cg14391737* | chr11      | 86513429  | PRSS23          | 6.70E-21 | -0.7414 | D               |
| cg05575921* | chr5       | 373378    | AHRR            | 8.56E-19 | -0.8692 | B, SB, T, Wk, D |
| cg01940273* | chr2       | 233284934 | ALPPL2          | 2.87E-14 | -0.5798 | S, SB, T, D     |
| cg21911711* | chr19      | 16998668  | F2RL3           | 3.90E-14 | -0.5741 | D               |
| cg00475490* | chr11      | 86517110  | PRSS23          | 1.93E-13 | -0.6170 | D               |
| cg03636183* | chr19      | 17000585  | F2RL3           | 5.23E-13 | -0.6784 | S, SB, D        |
| cg00045592* | chr1       | 160714299 |                 | 2.30E-12 | -0.4137 | D               |
| cg19753864* | chr2       | 38320028  | CYP1B1          | 2.69E-11 | -0.5020 |                 |
| cg14753356* | chr6       | 30720108  |                 | 6.87E-10 | -0.6105 | S, SB, D        |
| cg18110140* | chr15      | 75350380  | PPCDC           | 7.57E-10 | -0.0977 | D               |
| cg06344992  | chr15      | 90345999  | ANPEP           | 1.24E-09 | 0.4181  |                 |
| cg06644428  | chr2       | 233284112 |                 | 2.13E-09 | -0.5488 | SB, T, D        |
| cg03634967  | chr6       | 44187219  | SLC29A1         | 6.61E-09 | 0.3970  |                 |
| cg23432008  | chr15      | 90346094  | ANPEP           | 7.33E-09 | 0.4779  |                 |
| cg06581475* | chr15      | 75020202  |                 | 8.25E-09 | -0.5828 |                 |
| cg07251887* | chr17      | 73641809  |                 | 2.56E-08 | -0.4984 | D               |
| cg19572487* | chr17      | 38476024  | RARA            | 3.34E-08 | -0.4684 | S, SB, D        |
| cg02008229  | chr15      | 90346089  | ANPEP           | 3.35E-08 | 0.4609  |                 |
| cg16841366* | chr2       | 233286192 | AC068134.6      | 4.43E-08 | -0.4221 | D               |
| cg04175292  | chr6       | 44187226  | SLC29A1         | 5.03E-08 | 0.3905  |                 |
| cg04330449  | chr5       | 134871166 | NEUROG1         | 6.42E-08 | 0.3797  |                 |

**Supplementary Table 3. GO enrichment to SS-related DMS.** The table shows the GO terms setting an FDR < 0.05.

| GO         | Term                                                               | Ontology | N    | DE  | P-value  | FDR      |
|------------|--------------------------------------------------------------------|----------|------|-----|----------|----------|
| GO:0009410 | response to xenobiotic stimulus<br>cellular response to xenobiotic | BP       | 116  | 17  | 1.49E-12 | 1.11E-08 |
| GO:0071466 | stimulus                                                           | BP       | 109  | 16  | 7.07E-12 | 3.94E-08 |
| GO:0006805 | xenobiotic metabolic process                                       | BP       | 105  | 15  | 3.43E-11 | 1.53E-07 |
| GO:0052695 | cellular glucuronidation                                           | BP       | 17   | 9   | 5.05E-11 | 1.87E-07 |
| GO:0009812 | flavonoid metabolic process                                        | BP       | 15   | 9   | 5.98E-11 | 1.90E-07 |
| GO:0006063 | uronic acid metabolic process                                      | BP       | 22   | 9   | 4.00E-10 | 9.91E-07 |
| GO:0019585 | glucuronate metabolic process                                      | BP       | 22   | 9   | 4.00E-10 | 9.91E-07 |
| GO:0015020 | glucuronosyltransferase activity                                   | MF       | 33   | 9   | 1.37E-08 | 3.05E-05 |
| GO:0051552 | flavone metabolic process                                          | BP       | 6    | 5   | 1.91E-07 | 0.000387 |
| GO:0005996 | monosaccharide metabolic process                                   | BP       | 269  | 19  | 2.99E-07 | 0.000555 |
| GO:0001972 | retinoic acid binding                                              | MF       | 18   | 7   | 3.30E-07 | 0.000565 |
| GO:0005501 | retinoid binding                                                   | MF       | 32   | 7   | 2.78E-06 | 0.004428 |
| GO:0019840 | isoprenoid binding                                                 | MF       | 34   | 7   | 3.36E-06 | 0.004986 |
| GO:0009404 | toxin metabolic process                                            | BP       | 15   | 5   | 5.75E-06 | 0.008004 |
| GO:0042573 | retinoic acid metabolic process                                    | BP       | 23   | 6   | 6.34E-06 | 0.008301 |
| GO:0033293 | monocarboxylic acid binding                                        | MF       | 58   | 8   | 6.71E-06 | 0.008304 |
| GO:0032787 | monocarboxylic acid metabolic process                              | BP       | 582  | 24  | 9.20E-06 | 0.010788 |
| GO:0012505 | endomembrane system                                                | CC       | 4217 | 98  | 1.16E-05 | 0.012875 |
| GO:0005975 | carbohydrate metabolic process                                     | BP       | 585  | 24  | 1.62E-05 | 0.017155 |
| GO:0050896 | response to stimulus                                               | BP       | 8418 | 164 | 2.21E-05 | 0.022374 |
| GO:0072359 | circulatory system development                                     | BP       | 1001 | 38  | 2.91E-05 | 0.027041 |
| GO:0019748 | secondary metabolic process                                        | BP       | 56   | 7   | 2.89E-05 | 0.027041 |
| GO:0006721 | terpenoid metabolic process                                        | BP       | 108  | 9   | 3.92E-05 | 0.034941 |
| GO:0008194 | UDP-glycosyltransferase activity                                   | MF       | 142  | 11  | 4.48E-05 | 0.038388 |

**Supplementary Table 4. KEGG enrichment to SS-related DMS.** The table shows the significant KEGG pathways with FDR < 0.05.

| Path          | Pathway                                      | N   | DE | P-value     | FDR         |
|---------------|----------------------------------------------|-----|----|-------------|-------------|
| path:hsa00053 | Ascorbate and aldarate metabolism            | 27  | 9  | 2.20E-10    | 4.44E-08    |
| path:hsa00140 | Steroid hormone biosynthesis                 | 58  | 11 | 4.08E-10    | 4.44E-08    |
| path:hsa00830 | Retinol metabolism                           | 64  | 11 | 3.01E-10    | 4.44E-08    |
| path:hsa00980 | Metabolism of xenobiotics by cytochrome P450 | 73  | 11 | 8.96E-10    | 7.32E-08    |
| path:hsa05204 | Chemical carcinogenesis                      | 81  | 11 | 2.04E-09    | 1.33E-07    |
| path:hsa00040 | Pentose and glucuronate interconversions     | 33  | 9  | 4.26E-09    | 1.99E-07    |
| path:hsa00982 | Drug metabolism - cytochrome P450            | 69  | 10 | 3.80E-09    | 1.99E-07    |
| path:hsa00860 | Porphyrin and chlorophyll metabolism         | 42  | 9  | 8.55E-09    | 3.50E-07    |
| path:hsa00983 | Drug metabolism - other enzymes              | 79  | 10 | 6.12E-08    | 2.22E-06    |
| path:hsa04062 | Chemokine signaling pathway                  | 185 | 12 | 5.58E-05    | 0.001823538 |
| path:hsa05418 | Fluid shear stress and atherosclerosis       | 139 | 10 | 7.34E-05    | 0.002183085 |
| path:hsa04520 | Adherens junction                            | 72  | 7  | 0.001457298 | 0.039711369 |

1. Bojesen SE, Timpson N, Relton C, Davey Smith G, Nordestgaard BG (2017): AHRR (cg05575921) hypomethylation marks smoking behaviour, morbidity and mortality. *Thorax*. 72:646-653.
2. Sayols-Baixeras S, Lluís-Ganella C, Subirana I, Salas LA, Vilahur N, Corella D, et al. (2015): Identification of a new locus and validation of previously reported loci showing differential methylation associated with smoking. The REGICOR study. *Epigenetics*. 10:1156-1165.
3. Tsai PC, Glastonbury CA, Eliot MN, Bollepalli S, Yet I, Castillo-Fernandez JE, et al. (2018): Smoking induces coordinated DNA methylation and gene expression changes in adipose tissue with consequences for metabolic health. *Clin Epigenetics*. 10:126.
4. Wiklund P, Karhunen V, Richmond RC, Parmar P, Rodriguez A, De Silva M, et al. (2019): DNA methylation links prenatal smoking exposure to later life health outcomes in offspring. *Clin Epigenetics*. 11:97.
5. Su D, Wang X, Campbell MR, Porter DK, Pittman GS, Bennett BD, et al. (2016): Distinct Epigenetic Effects of Tobacco Smoking in Whole Blood and among Leukocyte Subtypes. *PLoS One*. 11:e0166486.
6. Wan ES, Qiu W, Carey VJ, Morrow J, Bacherman H, Foreman MG, et al. (2015): Smoking-Associated Site-Specific Differential Methylation in Buccal Mucosa in the COPD Gene Study. *Am J Respir Cell Mol Biol*. 53:246-254.
7. Sikdar S, Joehanes R, Joubert BR, Xu CJ, Vives-Usano M, Rezwani FI, et al. (2019): Comparison of smoking-related DNA methylation between newborns from prenatal exposure and adults from personal smoking. *Epigenomics*. 11:1487-1500.
8. Miao L, Yin RX, Zhang QH, Hu XJ, Huang F, Chen WX, et al. (2019): Integrated DNA methylation and gene expression analysis in the pathogenesis of coronary artery disease. *Aging (Albany NY)*. 11:1486-1500.
9. Richard MA, Huan T, Ligthart S, Gondalia R, Jhun MA, Brody JA, et al. (2017): DNA Methylation Analysis Identifies Loci for Blood Pressure Regulation. *Am J Hum Genet*. 101:888-902.
10. Domingo-Relloso A, Riffo-Campos AL, Haack K, Rentero-Garrido P, Ladd-Acosta C, Fallin DM, et al. (2020): Cadmium, Smoking, and Human Blood DNA Methylation Profiles in Adults from the Strong Heart Study. *Environ Health Perspect*. 128:67005.
